# Supplementary material
Source: publisher figshare collection journal article supplement (https://karger.figshare.com/ndownloader/files/22460609)
Supplement: Supplementary file 1 [file 22460609]

**Supplementary Table 2. Details of histological changes after revision and impact on clinical management.**

| ***N*** | **Histopathological changes** | **Referral or second opinion** | **Change in management** |
| --- | --- | --- | --- |
| 1 | First assessment of Ki67 | Referred patient | Medical treatment |
| 2 | Definition of type (gastric NET) | Referred patient | Only follow-up |
| 3 | First assessment of Ki67 | Referred patient | Medical treatment |
| 4 | Tumor invasion*, lower Ki67 (-2%), lower grading (G2 to G1) | Referred patient | Only follow-up |
| 5 | First assessment of Ki67, additional immunohistochemical staining | Referred patient | Medical treatment |
| 6 | Higher Ki67 (+4%), higher grading (G1 to G2) | Referred patient | Medical treatment |
| 7 | First assessment of Ki67, additional immunohistochemical staining | Referred patient | Medical treatment |
| 8 | Tumor differentiation (G3) | Second opinion | Medical treatment |
| 9 | MANEC | Referred patient | Medical treatment |
| 10 | First assessment of Ki67 | Referred patient | Surgery |
| 11 | Exclusion of a NEN | Referred patient | Medical treatment |
| 12 | Exclusion of a NEN | Second opinion | Medical treatment |
| 13 | Exclusion of a NEN | Referred patient | Medical treatment |
| 14 | MANEC | Referred patient | Medical treatment |
| 15 | Higher Ki67 (+51%), higher grading (G2 to G3) | Referred patient | Medical treatment |
| 16 | Tumor differentiation (G3) | Referred patient | Medical treatment |
| 17 | Exclusion of a NEN | Referred patient | Medical treatment |
| 18 | MANEC | Referred patient | Medical treatment |
| 19 | Lower Ki67 (-3%), lower grading (G2 to G1) (type I gastric NET) | Referred patient | Endoscopic resection |
| 20 | Tumor invasion*, higher Ki67 (+5%), higher grading (G1 to G2) | Referred patient | Surgery |
| 21 | MANEC | Referred patient | Only follow-up |
| 22 | Tumor invasion* | Referred patient | Surgery + medical treatment |
| 23 | Tumor invasion* | Referred patient | Only follow-up |
| 24 | MANEC | Referred patient | Surgery |
| 25 | Tumor differentiation (G3) | Referred patient | Medical treatment |
| 26 | First assessment of Ki67 | Referred patient | Medical treatment |
| 27 | Exclusion of a NEN | Second opinion | Medical treatment |
| 28 | First diagnosis of a NEN | Referred patient | Only follow-up |
| 29 | Tumor invasion* | Referred patient | Surgery |
| 30 | Exclusion of a NEN | Referred patient | Medical treatment |
| 31 | Tumor invasion* | Referred patient | Surgery |
| 32 | First diagnosis of a NEN | Referred patient | Medical treatment |
| 33 | First diagnosis of a NEN | Second opinion | Medical treatment |
| 34 | Lower Ki67 (-10%) lower grading (G3 to G2) | Referred patient | Medical treatment |
| 35 | First assessment of Ki67, tumor invasion* | Referred patient | Further imaging test + only follow-up |
| 36 | First assessment of Ki67 | Referred patient | Only follow-up |
| 37 | Lower Ki67 (-3%), lower grading (G2 to G1) | Referred patient | Medical treatment |
| 38 | Lower Ki67 (-2%), lower grading (G2 to G1) | Referred patient | Only follow-up |
| 39 | Tumor invasion* | Referred patient | Medical treatment |
| 40 | Higher Ki67 (+2%), higher grading (G1 to G2), tumor invasion* | Second opinion | Further imaging test |
| 41 | First assessment of Ki67 | Referred patient | Medical treatment |
| 42 | Additional immunohistochemical staining | Referred patient | Further imaging test + surgery + medical treatment |
| 43 | Lower Ki67 (-35%), lower grading (G3 to G2), tumor invasion* | Second opinion | Medical treatment |
| 44 | Lower Ki67 (-5%), lower grading (G2 to G1) | Referred patient | Only follow-up |
| 45 | First assessment of Ki67 | Referred patient | Medical treatment |
| 46 | MANEC | Second opinion | Further imaging test |
| 47 | Higher Ki67 (+2%), higher grading (G1 to G2), tumor invasion* | Referred patient | Medical treatment |
| 48 | Lower Ki67 (-3%), lower grading (G2 to G1) | Referred patient | Medical treatment |
| 49 | Higher Ki67 (+3%), higher grading (G1 to G2) | Referred patient | Medical treatment |
| 50 | First assessment of Ki67 | Referred patient | Medical treatment |
| 51 | First diagnosis of a NEN | Second opinion | Medical treatment |
| 52 | First assessment of Ki67 | Second opinion | Medical treatment |
| 53 | Higher Ki67 (+3%), higher grading (G1 to G2), additional immunohistochemical staining | Referred patient | Medical treatment |
| 54 | First assessment of Ki67, tumor invasion* | Referred patient | Further imaging test |
| 55 | First assessment of Ki67, tumor invasion* | Referred patient | Further imaging test |
| 56 | First assessment of Ki67 | Referred patient | Further imaging test |
| 57 | Lower Ki67 (-10%), lower grading (G3 to G2), tumor invasion* | Referred patient | Medical treatment |
| 58 | Lower Ki67 (-3%), lower grading (G2 to G1), tumor invasion* | Referred patient | Further imaging test |
| 59 | Lower Ki67 (-1%), lower grading (G2 to G1), tumor invasion* | Referred patient | Only follow-up |
| 60 | Lower Ki67 (-4%), lower grading (G2 to G1), tumor invasion* | Referred patient | Only follow-up |
| 61 | Additional immunohistochemical staining | Referred patient | Medical treatment |
| 62 | Tumor invasion* | Referred patient | Further imaging test |
| 63 | Lower Ki67 (-2%), lower grading (G2 to G1), tumor invasion* | Referred patient | Further imaging test |

* Invasion parameters: TNM, R, or lymphovascular (L, V).

NET: neuroendocrine tumor; MANEC: mixed adenoneuroendocrine carcinoma; NEN: neuroendocrine neoplasm.
